# Supplementary material
Source: PubMed Central journal article supplement (PMC7997864)
Supplement: mmc1.pdf [file mmc1.pdf]

## Supplementary Figure 1

A) Antibodies testing in healthy subjects.

| Healthy subjects | IgG | IgM |
|------------------|-----|-----|
| 1                | -   | -   |
| 2                | -   | -   |
| 3                | -   | -   |
| 4                | -   | -   |
| 5                | -   | -   |
| 6                | -   | -   |
| 7                | -   | -   |
| Negative control | -   | -   |
| Positive control | +   | +   |

B) Image representative of antibodies testing.

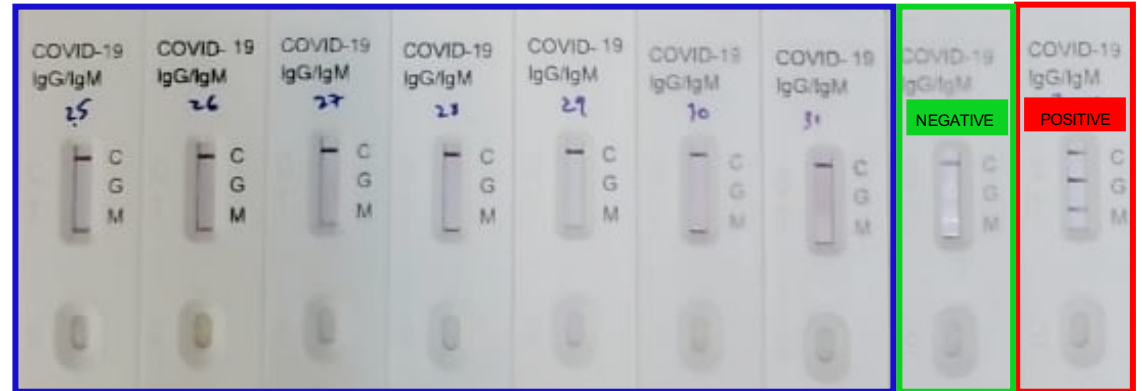

C) Baseline characteristics of healthy subjects.

| Characteristics           | Healthy Patients<br>(n=7) |
|---------------------------|---------------------------|
| <b><u>Demographic</u></b> |                           |
| Age (years), median IQR   | 45 (36-70)                |
| Male gender (%)           | 43%                       |
| Female gender (%)         | 57%                       |
